# Supplementary material for: Stamping colloidal photonic crystals: a facile way towards complex pixel colour patterns for sensing and displays
Source: Royal Society of Chemistry journal article supplement (doi:10.1039/c4nr05934d), 2014-12-10
Supplement: c4nr05934d1.pdf [file c4nr05934d1.pdf]

## Electronic Supplementary Information

### **Stamping colloidal photonic crystals: A facile way towards complex pixel colour patterns for sensing and displays**

*Tao Ding,<sup>a,b,\*</sup> Stoyan K. Smoukov,<sup>b</sup> and Jeremy J. Baumberg<sup>a,\*</sup>*

<sup>a</sup> Nanophotonics Centre, Cavendish Laboratory, University of Cambridge, CB3 0HE, UK

<sup>b</sup> Department of Materials Science and Metallurgy, 27 Charles Babbage Road, University of Cambridge  
CB3 0FS, UK

Corresponding authors E-mail: dt413@cam.ac.uk (TD); jjb12@cam.ac.uk (JJB)

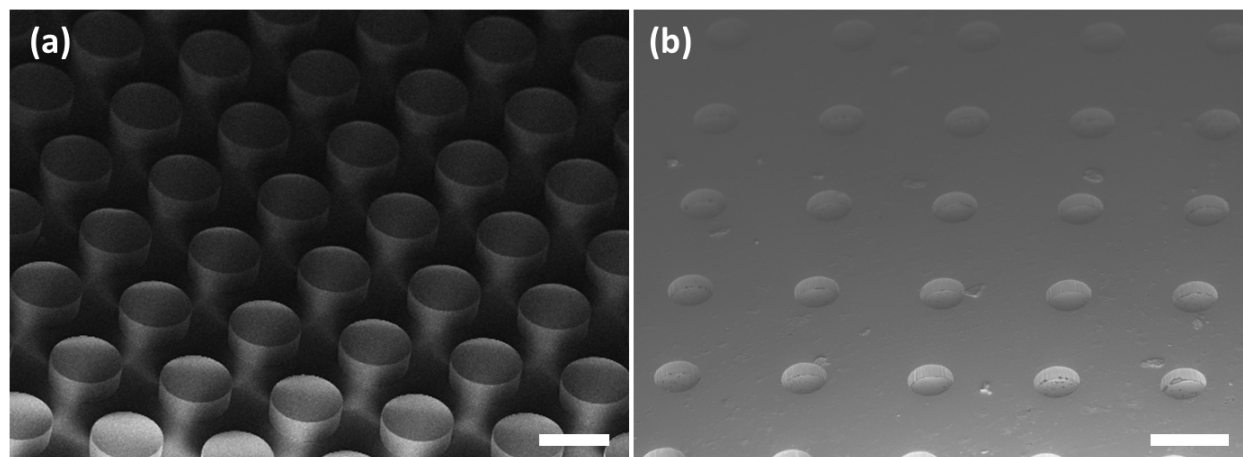

Fig. S1. SEM images of epoxy resin stamps used in this work showing (a) relief stamp, (b) engraved stamp. Scale bars are 100  $\mu\text{m}$ .

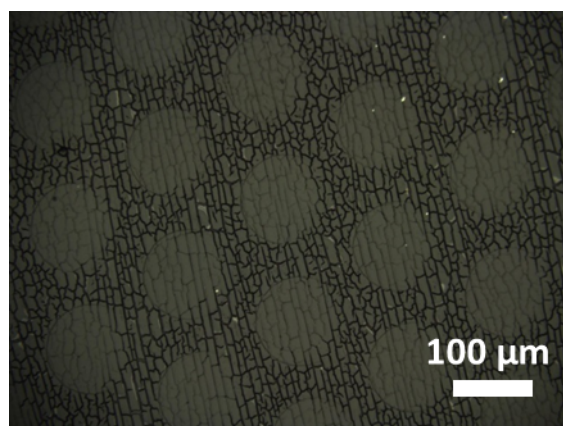

Fig. S2. Optical image of imprinted micropatterns of Poly(St-MMA-AA) CPCs under conditions of 110  $^{\circ}\text{C}$ , 30 bar for 60 s.

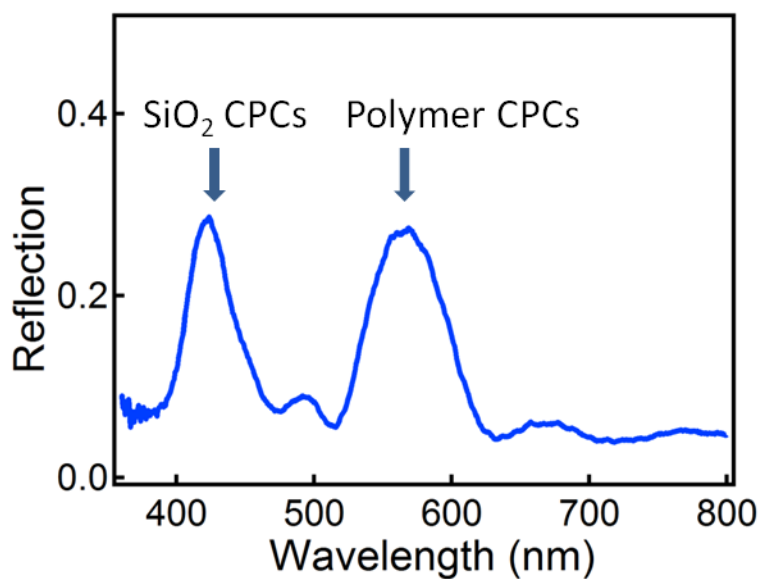

Fig. S3. Reflection spectra of the dual patterned CPCs made of SiO<sub>2</sub> and Poly(St-MMA-AA) over a large area.

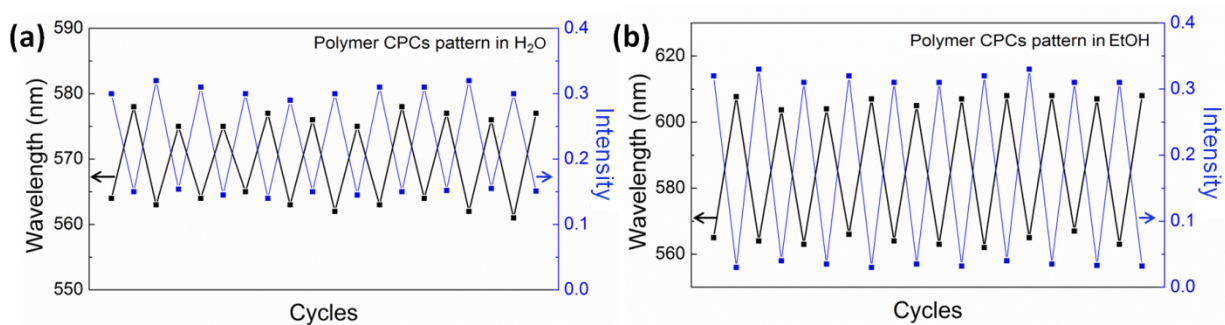

Fig. S4. Reversible response of the reflection peaks and intensities to liquid infiltration and drying, using (a) H<sub>2</sub>O, and (b) EtOH.

Table S1. Theoretical estimates of the wavelength and intensity of the Bragg peaks of the CPCs and comparison with the experimental values.

| Volume fraction<br>of EtOH (%) | Average<br>refractive<br>index | Intensity (%)<br>(Theor. value/Exp. Value <sup>a</sup> ) |                       | Bragg reflection peak (nm)<br>(Theor. value/Exp. Value <sup>b</sup> ) |                       |
|--------------------------------|--------------------------------|----------------------------------------------------------|-----------------------|-----------------------------------------------------------------------|-----------------------|
|                                |                                | PS/MMA/AA<br>CPCs                                        | SiO <sub>2</sub> CPCs | PS/MMA/AA<br>CPCs                                                     | SiO <sub>2</sub> CPCs |
| 0                              | 1.330                          | 100 / 100                                                | 100 / 100             | 605.5/575                                                             | 442.5/462             |
| 20                             | 1.336                          | 97 / 79                                                  | 95 / 44               | 606.0/588                                                             | 442.9/464             |
| 50                             | 1.345                          | 94 / 52                                                  | 88 / 36               | 606.9/605                                                             | 443.6/465             |
| 80                             | 1.354                          | 91 / 32                                                  | 81 / -                | 607.7/607                                                             | 444.4/ -              |
| 100                            | 1.360                          | 89 / 23                                                  | 75 / -                | 608.3/611                                                             | 444.8/ -              |

a. The experimental reflection intensity is expected to be smaller than the theoretical estimate even when they are fully infiltrated due to the existence of defects within the CPCs. These intensity values are normalized to the case when only H<sub>2</sub>O is used as the solvent.

b. The wavelength is expected to be larger than the experimental value because the packing of the CPC is not as large as 74% set by theory due to the stacking faults. Therefore, the overall refractive index of the CPC films is larger than the theoretical prediction after liquid infiltration.
